# Supplementary material
Source: ML conference proceedings conference paper supplement (https://openaccess.thecvf.com/content/CVPR2023/html/Qiu_CafeBoost_Causal_Feature_CVPR_2023_paper.html)
Supplement: Supplementary file 1 [file Qiu_CafeBoost_Causal_Feature_CVPR_2023_supplemental.pdf]

# Appendix on “CafeBoost: Causal Feature Boost to Eliminate Task-Induced Bias for Class Incremental Learning”

Benliu Qiu Hongliang Li\* Haitao Wen Heqian Qiu  
 Lanxiao Wang\* Fanman Meng Qingbo Wu Lili Pan  
 University of Electronic Science and Technology of China, Chengdu, China  
 {qbenliu, haitaowen, hqqiu, lanxiao.wang}@std.uestc.edu.cn  
 {hlili, fmmeng, qbwu}@uestc.edu.cn panlili8255@gmail.com

This appendix will provide further details for the main paper, including more experimental results (Appendix A), basic knowledge of causal graph (Appendix B), a proof of Equation 6 in the main paper (Appendix C) and more implementation details (Appendix D).

## A. Additional Results

Tab. 1 shows additional results on ImageNet-Full for 25 incremental tasks. We observe that our approach boosts the accuracy of LUCIR by 5.39% and reduces the corresponding forgetting by 1.11%. The curves of average incremental accuracy and forgetting rate are also given in Fig. 1. Our approach when combined with LUCIR, achieves a smoothly and slowly decreasing curve of accuracy and the corresponding increasing curve of forgetting. In addition, we plot curves of the forgetting rate on CIFAR-100 and ImageNet-Sub for 5, 10, and 25 incremental tasks, as shown in Fig. 3. It can be observed that our approach suffers from less forgetting in most tasks.

| Method         | LwF   | BiC   | iCaRL | LUCIR | GeoDL        | iCaRL+ours         | LUCIR+ours                |
|----------------|-------|-------|-------|-------|--------------|--------------------|---------------------------|
| Accuracy (%)   | 36.87 | 53.47 | 43.14 | 56.56 | <b>62.20</b> | 41.30 <i>-1.84</i> | 61.95 <i>+5.39</i>        |
| Forgetting (%) | 49.84 | 33.17 | 38.80 | 30.30 | 15.11        | 33.59 <i>-5.21</i> | <b>14.00</b> <i>-1.11</i> |

Table 1. The average incremental accuracy and the forgetting rate on ImageNet-Full for 25 incremental tasks. 20 exemplars are used per class.

## B. Basic Knowledge of Causal Graph

### B.1. Causal Graph

As shown in Fig. 2, there are three basic causal configurations in causal theory: chain, collider, and fork, which consist of more complex causal graphs. **Chain** is a configuration of variables which contains three nodes and two edges with one edge directed into and one edge directed out of the middle variable, as shown in Fig. 2 (a). **Collider** with

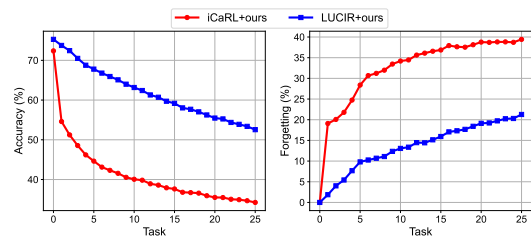

Figure 1. The curves of accuracy and forgetting on ImageNet-Full for 25 incremental tasks. 20 exemplars are used for each class.

one node receives edges from two other nodes, is illustrated in Fig. 2 (b). **Fork** with two arrows emanating from the middle variable, is shown in Fig. 2 (c), which is the prime configuration we consider in the main paper.

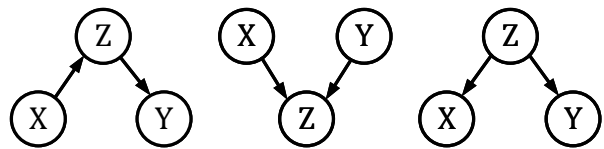

Figure 2. Three basic configurations of causal graphs.

### B.2. Conditional independence

[5] summarizes three rules to determine dependencies and independencies of two end nodes in the above-mentioned three basic configurations. These rules are described below, which are easily understood with the help of Fig. 2.

**Rule 1 (Conditional Independence in Chains)** *Two variables  $X$  and  $Y$  are conditionally independent given  $Z$ , if there is only one unidirectional path between  $X$  and  $Y$  and  $Z$  is any set of variables that intercepts that path.*

**Rule 2 (Conditional Independence in Colliders)** *If a*

\*Corresponding authors.

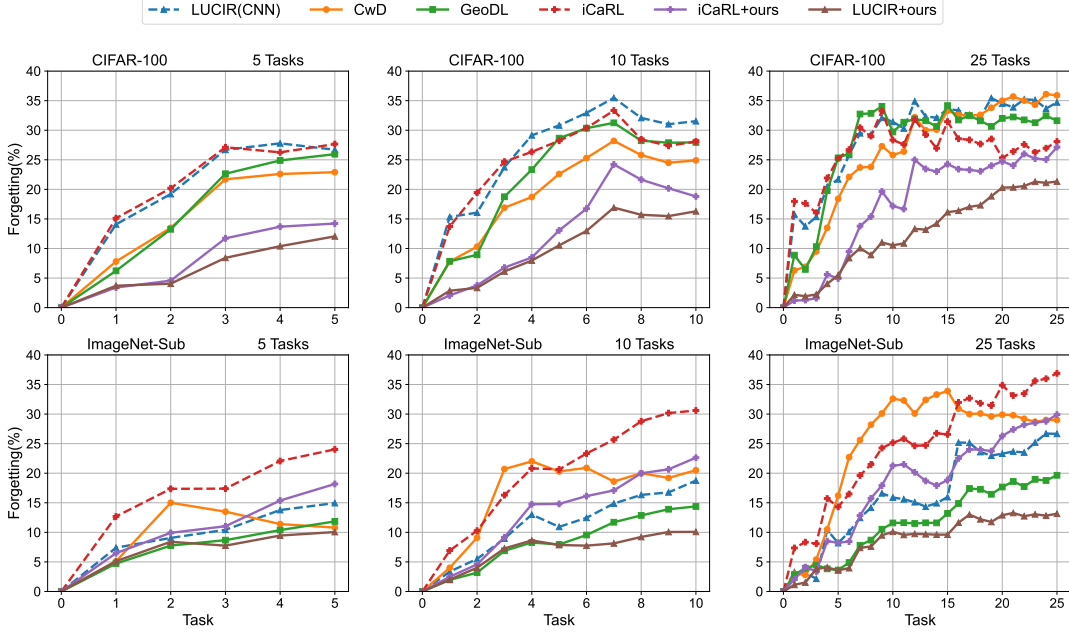

Figure 3. The forgetting rate on CIFAR-100 and ImageNet-Sub for 5, 10, and 25 incremental tasks. 20 exemplars are used for each class.

variable  $Z$  is the collision node between two variables  $X$  and  $Y$ , and there is only one path between  $X$  and  $Y$ , then  $X$  and  $Y$  are unconditionally independent but are dependent conditional on  $Z$  and any descendants of  $Z$ .

**Rule 3 (Conditional Independence in Forks)** If a variable  $Z$  is a common cause of variables  $X$  and  $Y$ , and there is only one path between  $X$  and  $Y$ , then  $X$  and  $Y$  are independent conditional on  $Z$ .

According to **Rule 3**, in causal path  $X \leftarrow T \rightarrow Y$ , variable  $X$  cannot exert a causal effect on variable  $Y$  when conditioned on variable  $T$ . Therefore, the spurious correlation between  $X$  and  $Y$ , i.e., the task bias, does not exist for task incremental learning in the main paper. However, the task identifier  $T$  is not conditioned in class incremental learning, and hence  $X$  and  $Y$  are likely dependent, causing the task bias.

### B.3. Causal intervention

#### B.3.1 do-operator

[5] introduces a do-operator  $do(\cdot)$ .  $do(X = x)$  means we fix  $X = x$  while  $X = x$  denotes the variable  $X$  takes a value  $x$ . As a result,  $P(Y = y|X = x)$  is the probability of  $Y = y$  conditional on  $X = x$ , whereas  $P(Y = y|do(X = x))$  is the probability of  $Y = y$  when we intervene to make  $X = x$ . In our main paper and this appendix, we simplify  $P(Y = y|X = x)$ ,  $P(Y = y|do(X = x))$  as  $P(Y|X)$ ,  $P(Y|do(X))$ , respectively for convenience.

#### B.3.2 backdoor criterion

**Definition 1 (The Backdoor Criterion)** Given an ordered pair of variables  $(X, Y)$  in a directed acyclic graph  $G$ , a set of variables  $Z$  satisfies the backdoor criterion relative to  $(X, Y)$  if no node in  $Z$  is a descendant of  $X$ , and  $Z$  blocks every path between  $X$  and  $Y$  that contains an arrow into  $X$ .

The backdoor criterion answers in what conditions the structure of the causal graph is sufficient for computing a causal effect from a given data set. [5] points out that if a set of  $Z$  satisfies the backdoor criterion for  $X$  and  $Y$ , the causal effect of  $X$  on  $Y$  is given by

$$P(Y|do(X)) = \sum_z P(Y|X, Z)P(Z). \quad (1)$$

In Fig. 3 (c) of the fork structure, the variable  $Z$  is not a descent of  $X$  and it blocks the only path  $X \leftarrow Z \rightarrow Y$  between  $X$  and  $Y$ . Therefore,  $Z$  satisfies the backdoor criterion and the causal effect of  $X$  on  $Y$  can be calculated by Eq. (1). In our main paper, we adopt the backdoor criterion and achieve **Equation 3**.

### C. Proof of Equation 6

Following the work [9] that firstly proposed NWGM to tackle image captioning task, we substitute  $NWGM[\text{Softmax}(f_y(\mathbf{x}, \mathbf{d}_t))]$  for  $\mathbb{E}_{\mathbf{d}_t}[\text{Softmax}(f_y(\mathbf{x}, \mathbf{d}_t))]$ . We denote  $f_y(\mathbf{x}, \mathbf{d}_t)$  as  $n_{y,t}$  and the probability of  $\mathbf{d}_t$  as  $P(\mathbf{d}_t)$ . Combining  $\text{Softmax}(f_y(\mathbf{x}, \mathbf{d}_t)) \propto \exp(f_y(\mathbf{x}, \mathbf{d}_t))$ ,

| Methods   | Epochs   | LR         | LR schedule    | LR decay rate | Weight decay                              | Momentum | Batch size | Other hyper-parameters                                                  |
|-----------|----------|------------|----------------|---------------|-------------------------------------------|----------|------------|-------------------------------------------------------------------------|
| iCaRL     | 160 (90) | 0.1        | 80 120 (30 60) | 0.1           | $5 \times 10^{-4}$ ( $1 \times 10^{-4}$ ) | 0.9      | 128        | $T = 2.0, \beta = 0.25$                                                 |
| LUCIR     | 160 (90) | 0.1        | 80 120 (30 60) | 0.1           | $5 \times 10^{-4}$ ( $1 \times 10^{-4}$ ) | 0.9      | 128        | $dist = 0.5, K = 2, rr = 0.0, \lambda_{lf} = 5(10), \lambda_{mr} = 1.0$ |
| GeoDL     | 160 (90) | 0.1        | 80 120 (30 60) | 0.1           | $5 \times 10^{-4}$ ( $1 \times 10^{-4}$ ) | 0.9      | 128        | $dist = 0.5, K = 2, rr = 0.0, \lambda_{lf} = 5(10)$                     |
| CwD       | 160 (90) | 0.1        | 80 120 (30 60) | 0.1           | $5 \times 10^{-4}$ ( $1 \times 10^{-4}$ ) | 0.9      | 128        | $dist = 0.5, K = 2, \lambda_{lf} = 5(10), \lambda_{mr} = 1.0$           |
| CSCCT     | 160 (90) | 0.4 (0.02) | 80 120 (30 60) | 0.1           | $5 \times 10^{-4}$ ( $1 \times 10^{-4}$ ) | 0.9      | 128        | $dist = 0.5, K = 2, \lambda_{lf} = 5(10), \lambda_{mr} = 1.0$           |
| CafeBoost | 160 (90) | 0.1        | 80 120 (30 60) | 0.1           | $5 \times 10^{-4}$ ( $1 \times 10^{-4}$ ) | 0.9      | 128        | $dist = 0.5, K = 2, rr = 0.0, \lambda_{lf} = 5(10), \lambda_{mr} = 1.0$ |

Table 2. Hyper-parameters for all methods. Values in parentheses are for ImageNet.

we can obtain

$$\begin{aligned}
& \mathbb{E}_{\mathbf{d}_t}[\text{Softmax}(f_y(\mathbf{x}, \mathbf{d}_t))] \\
& \approx \text{NMGH}[\text{Softmax}(f_y(\mathbf{x}, \mathbf{d}_t))] \\
& = \frac{\prod_t \exp(n_{y,t})^{P(\mathbf{d}_t)}}{\sum_i \prod_t \exp(n_{i,t})^{P(\mathbf{d}_t)}} \quad (2) \\
& = \frac{\exp(\mathbb{E}_{\mathbf{d}_t}[n_{y,t}])}{\sum_i \exp(\mathbb{E}_{\mathbf{d}_t}[n_{i,t}])} \\
& = \text{Softmax}(\mathbb{E}_{\mathbf{d}_t}[f_y(\mathbf{x}, \mathbf{d}_t)]),
\end{aligned}$$

i.e, **Equation 6** in the main paper.

## D. Implementation Details

We adopt a 18-layer ResNet [2] for both CIFAR-100 and ImageNet. Random cropping and horizontal flipping are only data augmentations used in training datasets for all the methods. Details of hyper-parameters of all methods are listed in Tab. 2. Additional settings of some baseline methods are described below.

**iCaRL** [6]:  $T$  denotes the temperature for distillation, set to 2.0.  $\beta$  is the weight coefficient for distillation, set to 0.25. Both classification loss and KD loss use multi-class cross entropy loss, following [4].

**LUCIR** [3]: Distance  $dist$  and  $K$  for margin ranking loss is set to 0.5 and 2, respectively. The weight of less forget loss is  $\lambda_{lf} = 5$  for CIFAR-100 and 10 for ImageNet. Margin ranking loss gains a weight  $\lambda_{mr} = 1.0$  for both datasets.

**GeoDL** [8]: We implement GeoDL on the base of LUCIR, and thus its corresponding hyper-parameters are the same as LUCIR. The weight of distillation loss considering geodesic flow is set to 1.0.

**CwD** [7]: CwD is also implemented on LUCIR and its hyper-parameters are mostly the same as LUCIR. For CIFAR-100, CwD sets the learning rate for first task to 0.1, whereas 0.2 for ImageNet. The rejection threshold of class-wise decorrelation loss ( $L_{CwD}$ ) is 1. The weight of  $L_{CwD}$  is 0.5 and 0.75 for CIFAR-100 and ImageNet, respectively.

**CSCCT** [1]: As a plugin method, CSCCT is plug into LUCIR by us. The coefficient of cross-space clustering loss and controlled transfer loss is 3 and 1.5 respectively. The temperature of controlled transfer loss is set to 2.0.

**CafeBoost** (ours): Our plugin method can be added on the base of iCaRL and LUCIR. Therefore, the correspond-

ing hyper-parameters are same as theirs. The causal debias module is trained for 160(90) epochs in its first training stage for CIFAR-100 (ImageNet), where the feature extractor of ResNet is fixed, as shown in Algorithm 1 of the main paper. Moreover, we update the feature extractor by a learning rate 0.01 during class incremental phases.

## E. Memory and Time Cost

For both CIFAR-100 and ImageNet-Sub with 5 incremental phases, CafeBoost model consumes 49.2 MB memory space, only 9.4% more than LUCIR (44.9 MB). For training time using NVIDIA TITAN Xp, CafeBoost requires 5-6 h and 18-22 h training time on CIFAR-100 and Image-Sub, respectively.

## References

- [1] Arjun Ashok, K. J. Joseph, and Vineeth Balasubramanian. Class-incremental learning with cross-space clustering and controlled transfer. In *ECCV*, 2022. 2
- [2] Kaiming He, Xiangyu Zhang, Shaoqing Ren, and Jian Sun. Deep residual learning for image recognition. In *CVPR*, 2016. 2
- [3] Saihui Hou, Xinyu Pan, Chen Change Loy, Zilei Wang, and Dahua Lin. Learning a unified classifier incrementally via rebalancing. In *CVPR*, 2019. 2
- [4] Khurram Javed and Faisal Shafait. Revisiting distillation and incremental classifier learning. In *ACCV*, 2019. 2
- [5] Judea Pearl, Madelyn Glymour, and Nicholas P. Jewell. *Causal Inference In Statistics: A primer*. Wiley, 2016. 1, 2
- [6] Sylvestre Alvisé Rebuffi, Alexander Kolesnikov, Georg Sperl, and Christoph H. Lampert. iCaRL: Incremental classifier and representation learning. In *CVPR*, 2017. 2
- [7] Yujun Shi, Kuangqi Zhou, Jian Liang, Zihang Jiang, Jiashi Feng, Philip H. S. Torr, Song Bai, and Vincent Y. F. Tan. Mimicking the oracle: An initial phase decorrelation approach for class incremental learning. In *CVPR*, 2022. 2
- [8] Christian Simon, Piotr Koniusz, and Mehrtash Harandi. On learning the geodesic path for incremental learning. In *CVPR*, 2021. 2
- [9] Kelvin Xu, Jimmy Lei Ba, Ryan Kiros, Kyunghyun Cho, Aaron Courville, Ruslan Salakhutdinov, Richard S. Zemel, and Yoshua Bengio. Show, attend and tell: Neural image caption generation with visual attention. 2015. 2
